# Supplementary material
Source: PubMed Central journal article supplement (PMC8403928)
Supplement: pnas.2101985118.sapp.pdf [file pnas.2101985118.sapp.pdf]

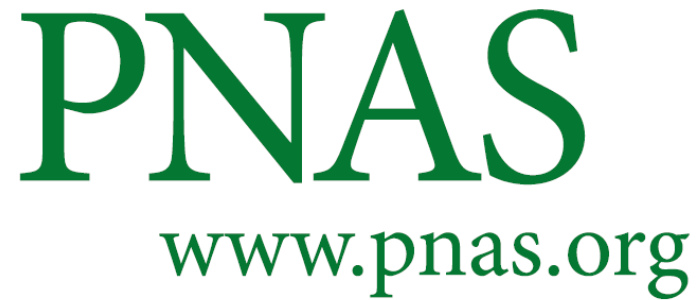

**Supplementary Information for**  
Moonrise timing is key for synchronized spawning in coral  
*Dipsastraea speciosa*

Che-Hung Lin, Shunichi Takahashi, Aziz J Mulla, Yoko Nozawa

Che-Hung Lin  
Email: [CHLin.coral@gmail.com](mailto:CHLin.coral@gmail.com)

Yoko Nozawa  
Email: [nozaway@gate.sinica.edu.tw](mailto:nozaway@gate.sinica.edu.tw)

**This PDF file includes:**

Figures S1 to S3  
Tables S1 to S2  
SI References

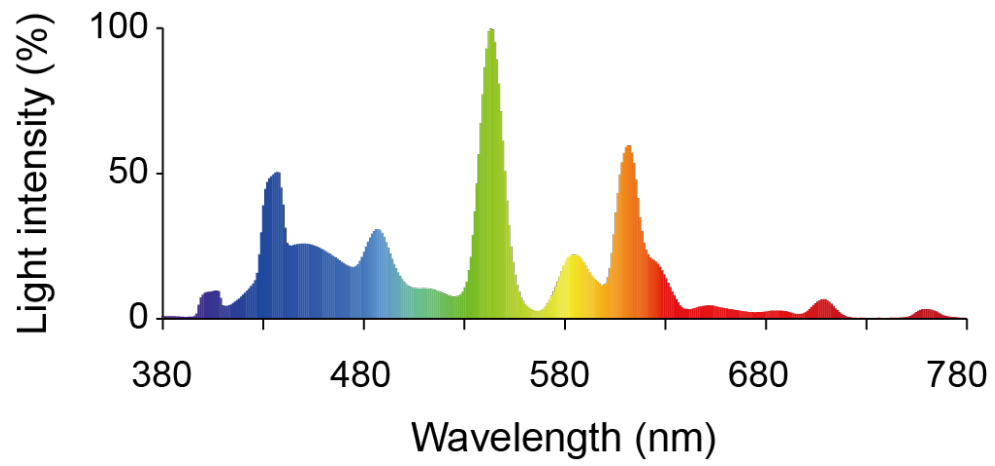

**Fig. S1.** The light spectrum used for bright (6000 lux;  $83 \mu\text{mol m}^{-2} \text{s}^{-1}$ ) and dim light ( $\sim 0.3$  lux) in the experiments. Note that  $1 \text{ lux} = 0.0138 \mu\text{mol m}^{-2} \text{s}^{-1}$  in this light spectrum.

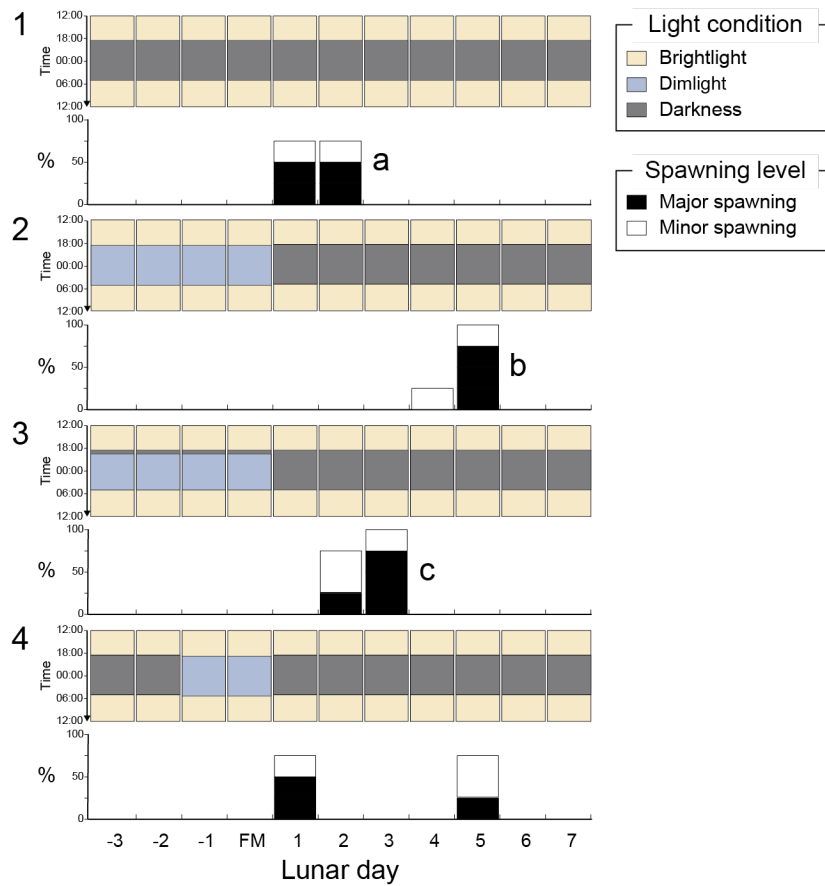

**Fig. S2. Spawning of *Dipsastraea speciosa* under different moonlight patterns.** Fragments of *D. speciosa* were exposed to artificial moonlight [dim light (~0.3 lux)] at nighttime (18:30–05:00) with different exposure hours and nights: no light (panel 1); dim light in 18:30–05:00 for the first 4 days (panel 2); dim light in 19:30–05:00 for the first 4 days (panel 3), and dim light for the 3<sup>rd</sup> and 4<sup>th</sup> nights after the initial no light for the first two days (panel 4). Black bars indicate major spawning (> hundreds of eggs) and white bars indicate minor spawning (several eggs) in four replicate fragments. Note that the panel 1 and 2 are the same as the panel 1 and 3 in Fig. 2b, and the experiment for panel 3 and 4 were conducted together with those in Fig. 2. Different letters in the panels indicate significant differences between the treatments (ANOVA and Tukey HSD test;  $P \leq 0.001$ ). For detailed results of statistical analysis, refer to SI Appendix, Table S2. Note that data for panel 4 were excluded from the analysis due to the split spawning observed only in this treatment.

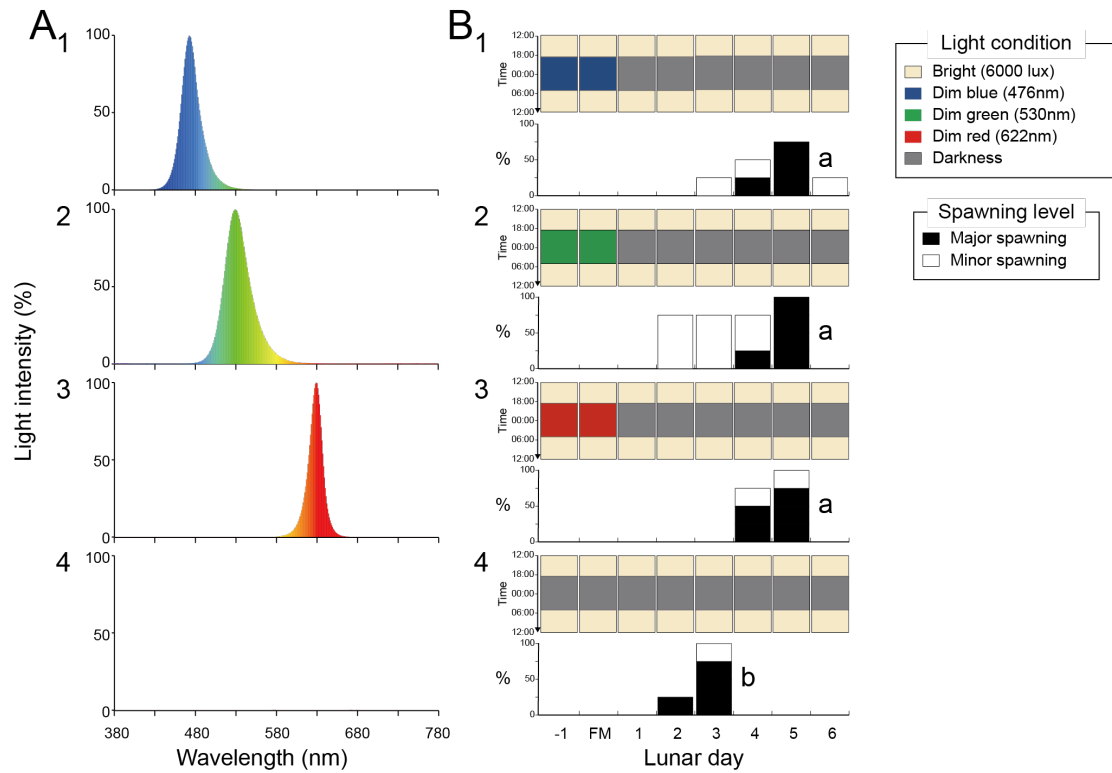

**Fig. S3. Spawning of *Dipsastraea speciosa* fragments under different spectra of artificial moonlight.** (A) Light spectrum of each treatment: blue LED light (the peak wavelength: 476 nm), green LED light (the peak wavelength: 530 nm), red LED light (the peak wavelength: 622 nm), and no light. (B) *Dipsastraea speciosa* fragments were exposed to three light spectra of artificial moonlight [blue, green and red dim light (~0.3 lux)] or no light at nighttime (18:30–05:00) for the first two days of the experiment. Black bars indicate major spawning (> hundreds of eggs) and white bars indicate minor spawning (several eggs) in four replicate fragments. Different letters in the panels in B indicate significant differences between the treatments (ANOVA and Tukey HSD test;  $P < 0.001$ ). For detailed results of statistical analysis, refer to SI Appendix, Table S2.

**Table S1.** List of (scleractinian) coral species that has been observed to spawn around last quarter moon from multiple locations around the world.

| Family           | Genus                | Species              | Spawning day<br>(days after full moon) | Reference            | Note                                        |  |
|------------------|----------------------|----------------------|----------------------------------------|----------------------|---------------------------------------------|--|
| Diploastreidae   | <i>Diploastrea</i>   | <i>heliopora</i>     | 4–5                                    | 1,2                  |                                             |  |
| Euphylliidae     | <i>Galaxea</i>       | <i>fascicularis</i>  | 4–8*                                   | 2-6                  | In most of the cases                        |  |
| Lobophylliidae   | <i>Lobophyllia</i>   | <i>hemprichii</i>    | 6–8                                    | 5,7                  |                                             |  |
| Merulinidae      | <i>Coelastrea</i>    | <i>aspera</i>        | 3–8                                    | 4-9                  |                                             |  |
|                  |                      | <i>palauensis</i>    | 5–6                                    | 5,9                  |                                             |  |
|                  | <i>Dipsastraea</i>   | <i>favus</i>         | 6–7                                    | 3                    |                                             |  |
|                  |                      | <i>pallida</i>       | 4–6                                    | 3,5,6                |                                             |  |
|                  |                      | <i>speciosa</i>      | 4–8                                    | 1,4,9                |                                             |  |
|                  |                      | <i>stelligera</i>    | 4–7                                    | 1,2                  |                                             |  |
|                  |                      | <i>Favites</i>       | <i>abditata</i>                        | 4–8                  | 1,3,4,7-10                                  |  |
|                  |                      |                      | <i>chinensis</i>                       | 5–6                  | 4,5                                         |  |
|                  |                      |                      | <i>contorta</i>                        | 7–10                 | 11                                          |  |
|                  | <i>entagona</i>      |                      | 5–6                                    | 5                    |                                             |  |
|                  | <i>magnistellata</i> |                      | 4–8                                    | 1,3,6,7              |                                             |  |
|                  | <i>Goniastrea</i>    | <i>pentagona</i>     | 4–8*                                   | 1,6,8,11             | In most of the cases                        |  |
|                  |                      | <i>valenciennesi</i> | 6–9                                    | 5,8                  |                                             |  |
|                  |                      | <i>edwardsi</i>      | 4–9                                    | 1,2,4,6,9            |                                             |  |
|                  |                      | <i>minuta</i>        | 3–6                                    | 1,12                 |                                             |  |
|                  |                      | <i>pectinata</i>     | 4–7                                    | 1,3,6,9              |                                             |  |
|                  |                      | <i>retiformis</i>    | 4–9*                                   | 2-7,10               | Spawned 1–4 days after full moon in Red Sea |  |
|                  |                      | <i>Leptoria</i>      | <i>phrygia</i>                         | 5–7                  | 1,4,5,10                                    |  |
|                  |                      | <i>Merulina</i>      | <i>ampliata</i>                        | 3–8                  | 3,6,7,9,10,12                               |  |
|                  |                      | <i>Orbicella</i>     | <i>annularis</i>                       | 5-8                  | 13                                          |  |
| <i>faveolata</i> |                      |                      | 5-8                                    | 13                   |                                             |  |
| <i>franksi</i>   | 4-7                  |                      | 13                                     |                      |                                             |  |
| <i>Pectinia</i>  | <i>alcicornis</i>    | 4–6                  | 5,6,9                                  |                      |                                             |  |
|                  | <i>lactuca</i>       | 4–6                  | 5,12                                   |                      |                                             |  |
|                  | <i>paeonia</i>       | 3–7                  | 5,12                                   |                      |                                             |  |
| <i>Platygyra</i> | <i>daedalea</i>      | 4–7                  | 1,4,6,10                               |                      |                                             |  |
|                  | <i>lamellina</i>     | 4, 6, 7              | 4,6                                    |                      |                                             |  |
|                  | <i>pini</i>          | 5, 6, 8              | 1,4,6,7                                |                      |                                             |  |
|                  | <i>ryukyuensis</i>   | 3–8                  | 1,3,7,12                               |                      |                                             |  |
|                  | <i>sinensis</i>      | 3–8*                 | 1,3-8,10,12                            | In most of the cases |                                             |  |
| Poritidae        | <i>Porites</i>       | <i>sp.</i>           | 5–8                                    | 1                    |                                             |  |

Study sites and references for **Table S1**.

| <b>Site</b>       | <b>Latitude</b> | <b>References</b> |
|-------------------|-----------------|-------------------|
| Kochi, Japan      | 32°N            | 8,11              |
| Okinawa, Japan    | 26°N            | 3                 |
| Taiwan            | 21°–22°N        | 1,4               |
| Palau             | 7°N             | 9                 |
| Singapore         | 1°N             | 12                |
| GBR, Australia    | 14°S–19°S       | 5,6               |
| Western Australia | 20°S–24°S       | 7,10              |
| Red Sea           | 21°–22°N        | 2                 |
| Caribbean         | 9°–23°N         | 13                |

**Table S2.** Summary of one-way blocked ANOVA and Tukey HSD pairwise comparison test for each experiment.

| <b>Experiment</b> | <b>Factor</b>         | <b>DF</b> | <b>F</b> | <b>p-value</b>    |
|-------------------|-----------------------|-----------|----------|-------------------|
| <b>Figure 1E</b>  | Treatment             | 2         | 769      | <b>&lt; 0.001</b> |
|                   | Colony (block)        | 3         | 8        | <b>0.016</b>      |
|                   | Residuals             | 6         |          |                   |
|                   | <b>Tukey HSD Test</b> |           |          |                   |
|                   | Panel 1 - Panel 2     |           |          | <b>&lt; 0.001</b> |
|                   | Panel 1 - Panel 3     |           |          | <b>&lt; 0.001</b> |
|                   | Panel 2 - Panel 3     |           |          | <b>&lt; 0.001</b> |
| <b>Figure 2B</b>  | Treatment             | 2         | 96.53    | <b>&lt; 0.001</b> |
|                   | Colony (block)        | 3         | 0.65     | 0.61              |
|                   | Residuals             | 6         |          |                   |
|                   | <b>Tukey HSD Test</b> |           |          |                   |
|                   | Panel 1 - Panel 2     |           |          | <b>0.001</b>      |
|                   | Panel 1 - Panel 3     |           |          | <b>&lt; 0.001</b> |
|                   | Panel 2 - Panel 3     |           |          | <b>&lt; 0.001</b> |
| <b>Figure 3</b>   | Treatment             | 3         | 35.11    | <b>&lt; 0.001</b> |
|                   | Colony (block)        | 3         | 0.92     | 0.47              |
|                   | Residuals             | 9         |          |                   |
|                   | <b>Tukey HSD Test</b> |           |          |                   |
|                   | Panel 1 - Panel 2     |           |          | <b>&lt; 0.001</b> |
|                   | Panel 1 - Panel 3     |           |          | <b>&lt; 0.001</b> |
|                   | Panel 1 - Panel 4     |           |          | 1.00              |
|                   | Panel 2 - Panel 3     |           |          | 0.46              |
|                   | Panel 2 - Panel 4     |           |          | <b>&lt; 0.001</b> |
|                   | Panel 3 - Panel 4     |           |          | <b>&lt; 0.001</b> |
| <b>Figure S2</b>  | Treatment             | 2         | 186.33   | <b>&lt; 0.001</b> |
|                   | Colony (block)        | 3         | 2.67     | 0.14              |
|                   | Residuals             | 6         |          |                   |
|                   | <b>Tukey HSD Test</b> |           |          |                   |
|                   | Panel 1 - Panel 2     |           |          | <b>&lt; 0.001</b> |
|                   | Panel 1 - Panel 3     |           |          | <b>0.001</b>      |
|                   | Panel 2 - Panel 3     |           |          | <b>&lt; 0.001</b> |
| <b>Figure S3B</b> | Treatment             | 3         | 29.1     | <b>&lt; 0.001</b> |
|                   | Colony (block)        | 3         | 2.7      | 0.11              |
|                   | Residuals             | 9         |          |                   |
|                   | <b>Tukey HSD Test</b> |           |          |                   |
|                   | Panel 1 - Panel 2     |           |          | 0.96              |
|                   | Panel 1 - Panel 3     |           |          | 0.96              |
|                   | Panel 1 - Panel 4     |           |          | <b>&lt; 0.001</b> |
|                   | Panel 2 - Panel 3     |           |          | 0.78              |
|                   | Panel 2 - Panel 4     |           |          | <b>&lt; 0.001</b> |
|                   | Panel 3 - Panel 4     |           |          | <b>&lt; 0.001</b> |

## SI References

- 1 Lin, C. H. & Nozawa, Y. Variability of spawning time (lunar day) in *Acropora* versus merulinid corals: a 7-yr record of in situ coral spawning in Taiwan. *Coral Reefs* 36, 1269-1278, doi:10.1007/s00338-017-1622-5 (2017).
- 2 Bouwmeester, J. *et al.* Multi-species spawning synchrony within scleractinian coral assemblages in the Red Sea. *Coral Reefs* 34, 65-77, doi:10.1007/s00338-014-1214-6 (2015).
- 3 Hayashibara, T. *et al.* Patterns of Coral Spawning at Akajima Island, Okinawa, Japan. *Marine Ecology Progress Series* 101, 253-262, doi:DOI 10.3354/meps101253 (1993).
- 4 Dai, C. F., Soong, K. & Fan, T. Y. in *Proceedings of the 7th International Coral Reef Symposium*. 448-455.
- 5 Willis, B. L., R.C. Babcock, P.L. Harrison and J.K Oliver. in *Proceedings of the 5th International Coral Reef Symposium*. 343-348 (1985).
- 6 Babcock, R. C. *et al.* Synchronous spawnings of 105 scleractinian coral species on the great barrier reef. *Marine Biology* 90, 379-394, doi:10.1007/bf00428562 (1986).
- 7 Simpson, C. J. Mass spawning of scleractinian corals in the Dampier archipelago and the implications of management of coral reefs in Western Australia. *Australia Department of Conservation Environmental Bulletin* 244, 1-35 (1985).
- 8 Mezaki, T. *et al.* Spawning patterns of high latitude scleractinian corals from 2002 to 2006 at Nishidomari, Otsuki, Kochi, Japan. *Kuroshio Biosphere* 3, 33-47 (2007).
- 9 Penland, L., Kloulechad, J., Idip, D. & van Woosik, R. Coral spawning in the western Pacific Ocean is related to solar insolation: evidence of multiple spawning events in Palau. *Coral Reefs* 23, 133-140, doi:10.1007/s00338-003-0362-x (2004).
- 10 Simpson, C. J., Cary, J. L. & Masini, R. J. Destruction of corals and other reef animals by coral spawn slicks on Ningaloo Reef, Western Australia. *Coral Reefs* 12, 185-191, doi:10.1007/BF00334478 (1993).
- 11 Nozawa, Y. Annual variation in the timing of coral spawning in a high-latitude environment: influence of temperature. *The Biological Bulletin* 222, 192-202, doi:10.1086/BBLv222n3p192 (2012).
- 12 Guest, J. R., Baird, A. H., Goh, B. P. L. & Chou, L. M. Seasonal reproduction in equatorial reef corals. *Invertebrate Reproduction & Development* 48, 207-218, doi:10.1080/07924259.2005.9652186 (2005).
- 13 Levitan, D. R. *et al.* Mechanisms of reproductive isolation among sympatric broadcast-spawning corals of the *Montastraea annularis* species complex. *Evolution* 58, 308-323, doi:DOI 10.1111/j.0014-3820.2004.tb01647.x (2004).
